# Supplementary material for: Using genome-wide associations to identify metabolic pathways involved in maize aflatoxin accumulation resistance
Source: PubMed Central journal article supplement (PMC4558830; doi:10.1186/s12864-015-1874-9), 2015-09-03

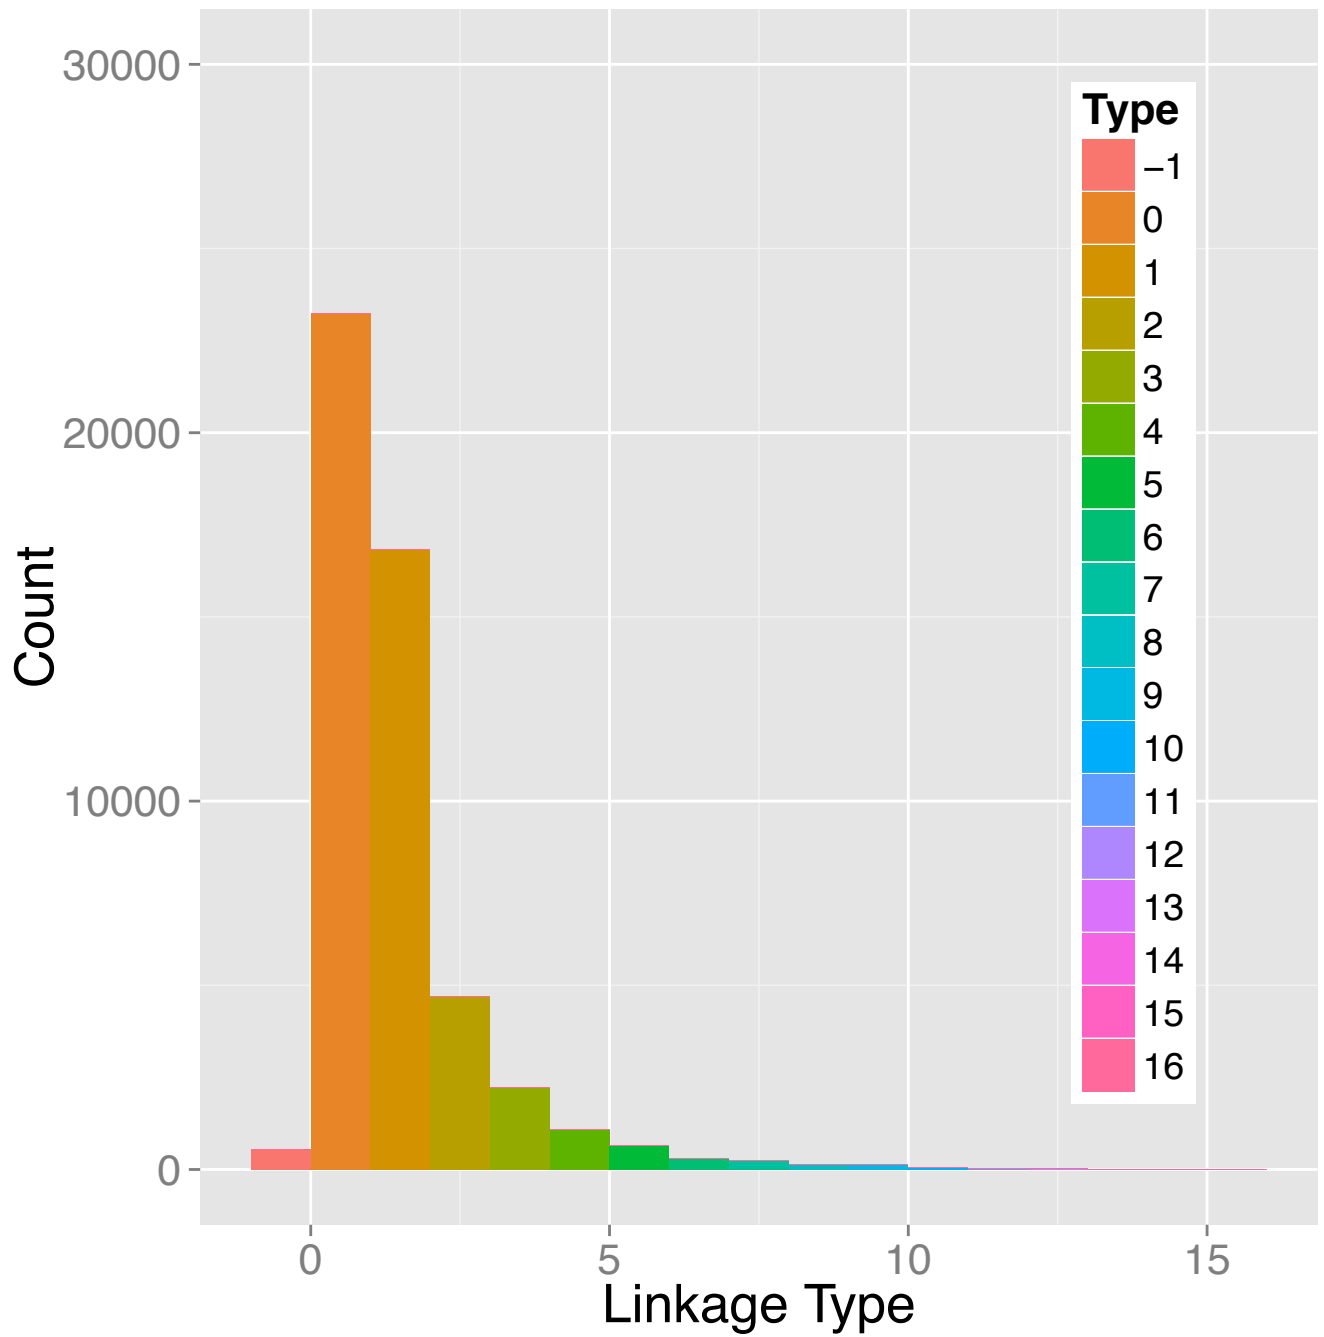

Supplement: 12864_2015_1874_MOESM2_ESM.pdf [file 12864_2015_1874_MOESM2_ESM.pdf]
